# Supplementary material
Source: ML conference proceedings conference paper supplement (https://openreview.net/forum?id=1ktdvp1EYI)

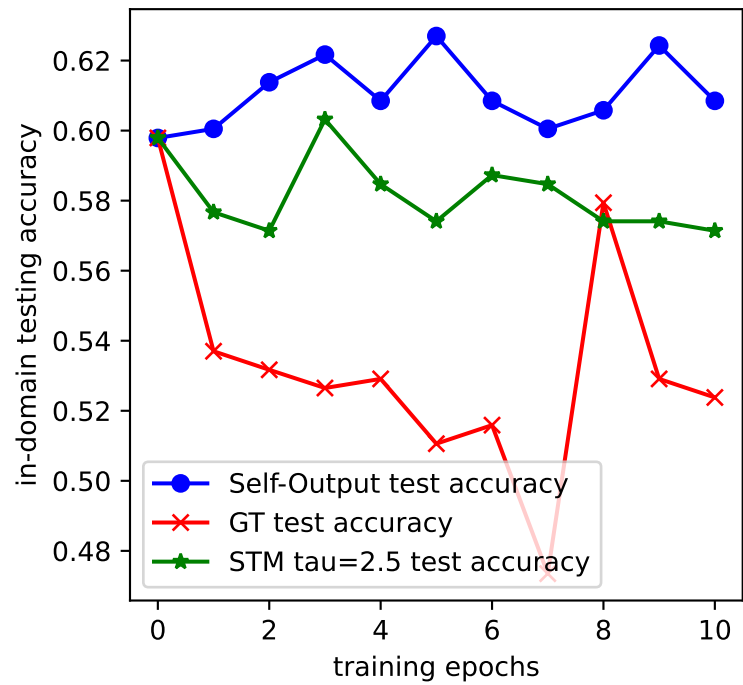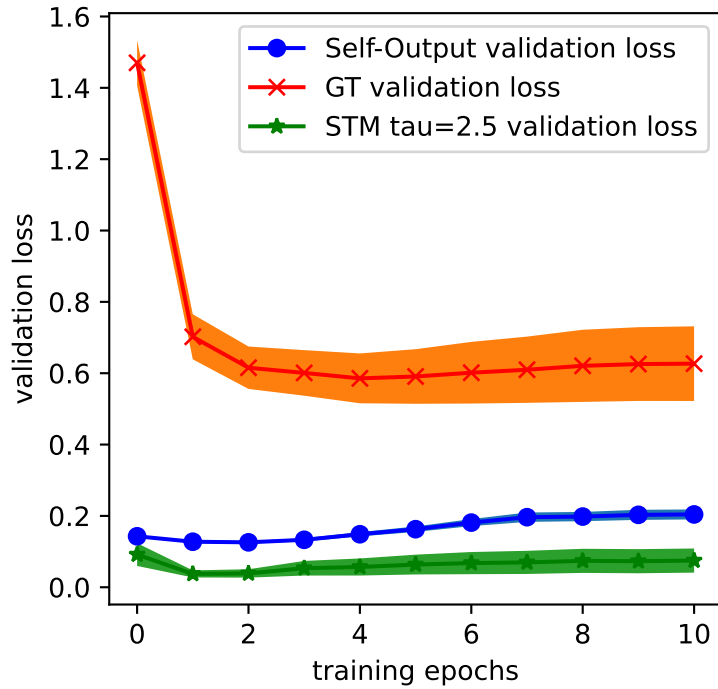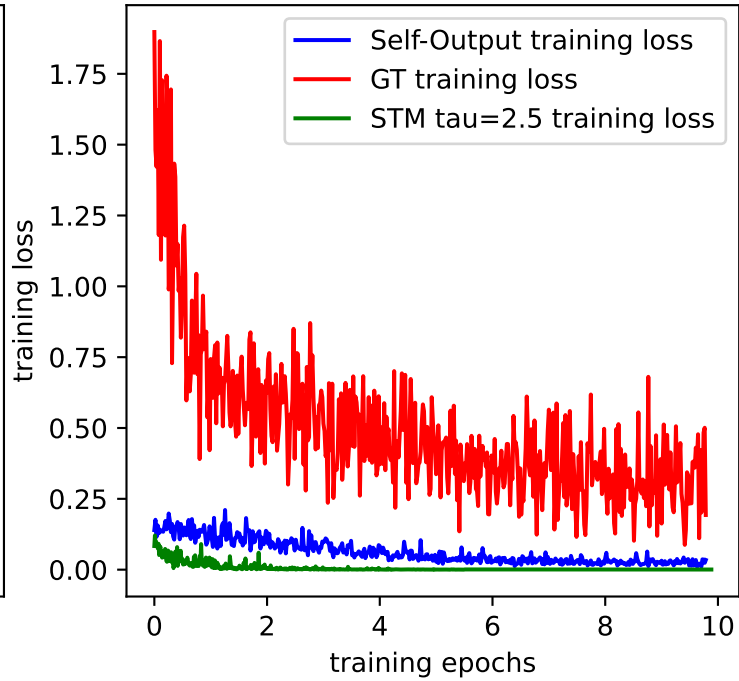

Supplement: supplementary_material [file convergence.pdf › robust-llm-finetunes-rebuttal/figures/convergence.pdf]
