# Supplementary material
Source: ML conference proceedings conference paper supplement (https://openreview.net/forum?id=1ktdvp1EYI)

Mistral 7B's high ppl tokens and all tokens in different MATH dataset by token category

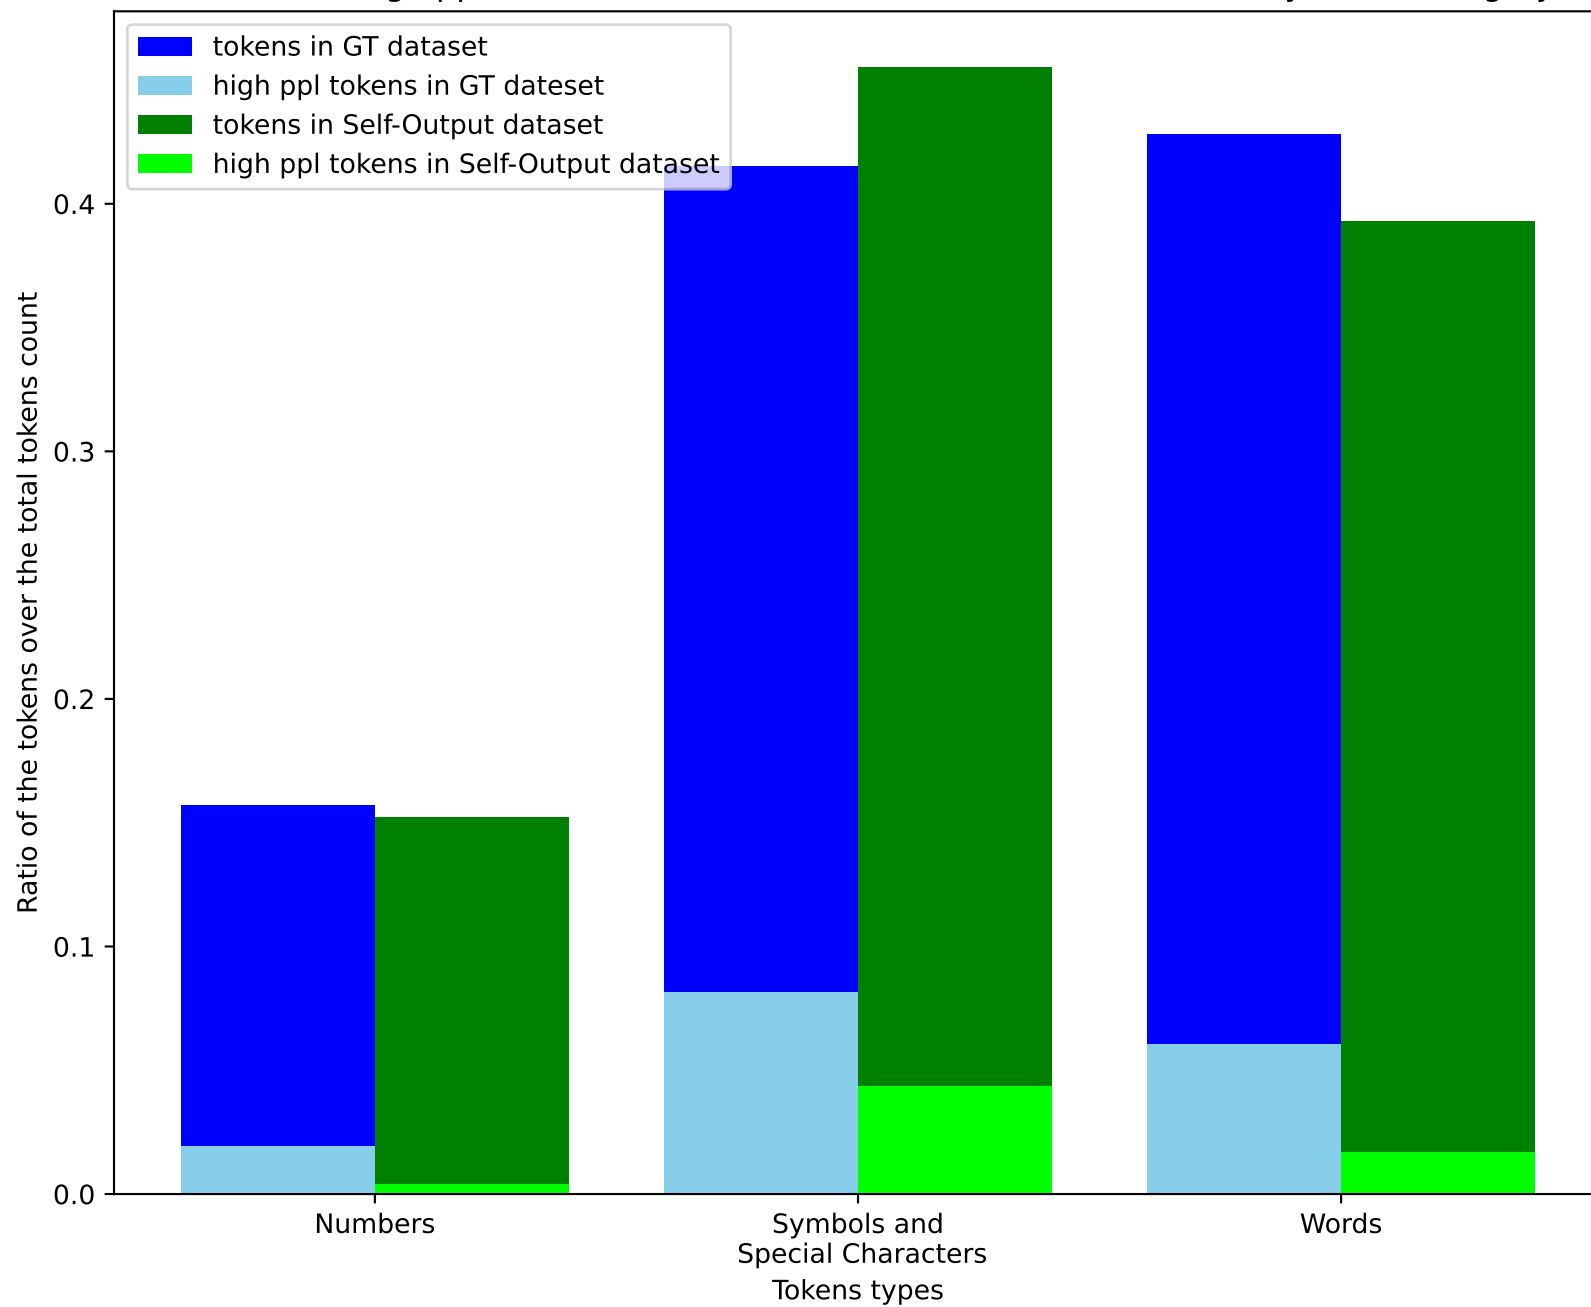

Supplement: supplementary_material [file mistral_hi_token_distribution.pdf › robust-llm-finetunes-rebuttal/figures/mistral_hi_token_distribution.pdf]
