# Supplementary material
Source: ML conference proceedings conference paper supplement (https://openreview.net/forum?id=1ktdvp1EYI)
Supplement: supplementary_material [file ppl_spike.pdf › robust-llm-finetunes-rebuttal/figures/ppl_spike.pdf]

Ground Truth

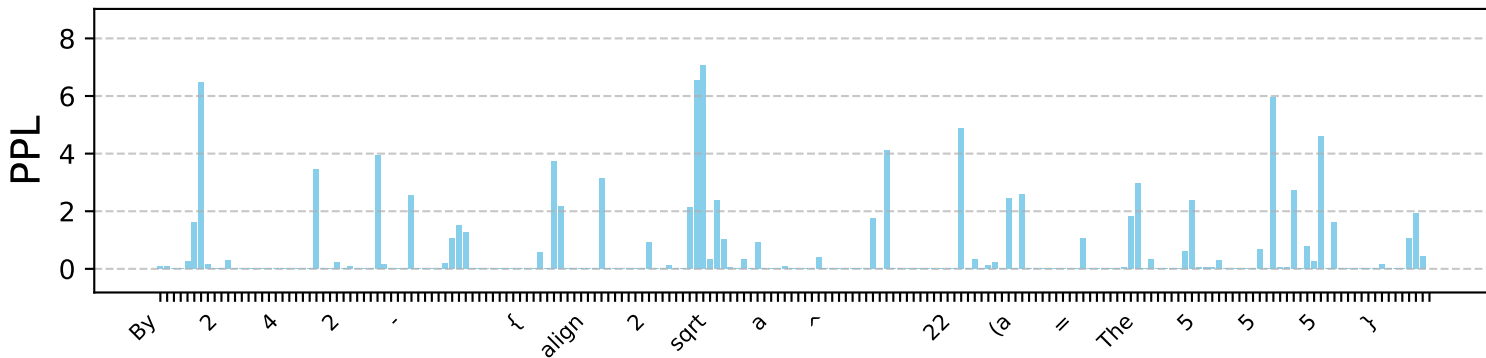

Rephrase (LLaMA 3 8B)

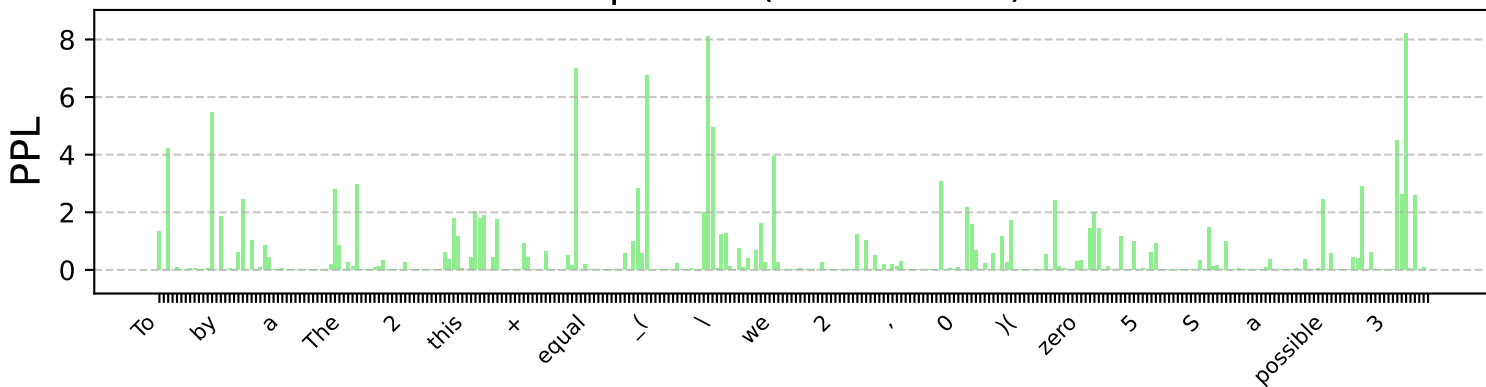

Self-Output (LLaMA 3 8B)

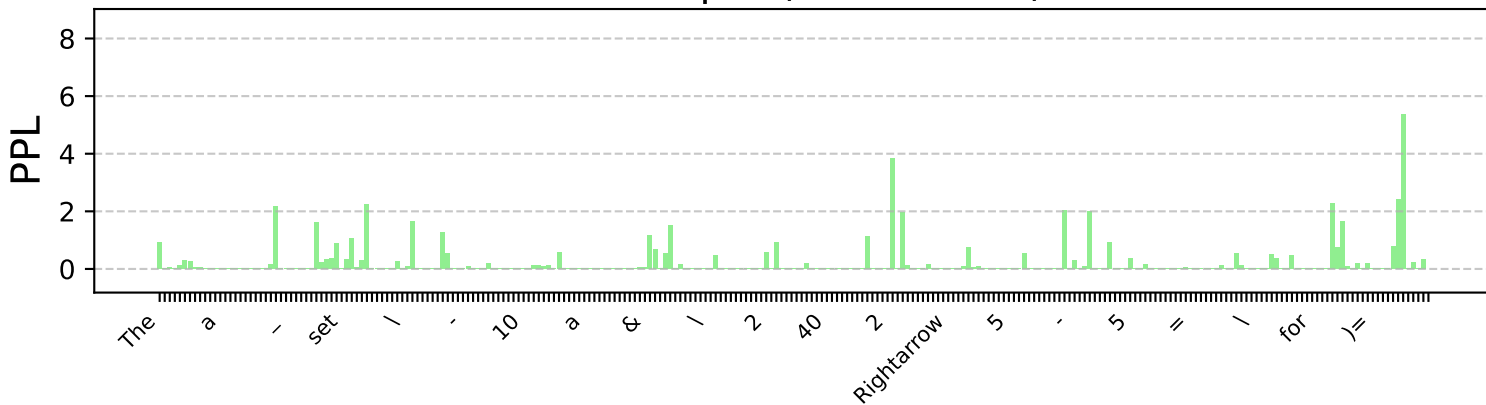

Token Position
