# Supplementary material
Source: ML conference proceedings conference paper supplement (https://openreview.net/forum?id=1ktdvp1EYI)

Out-domain performance with different regularization configs combination

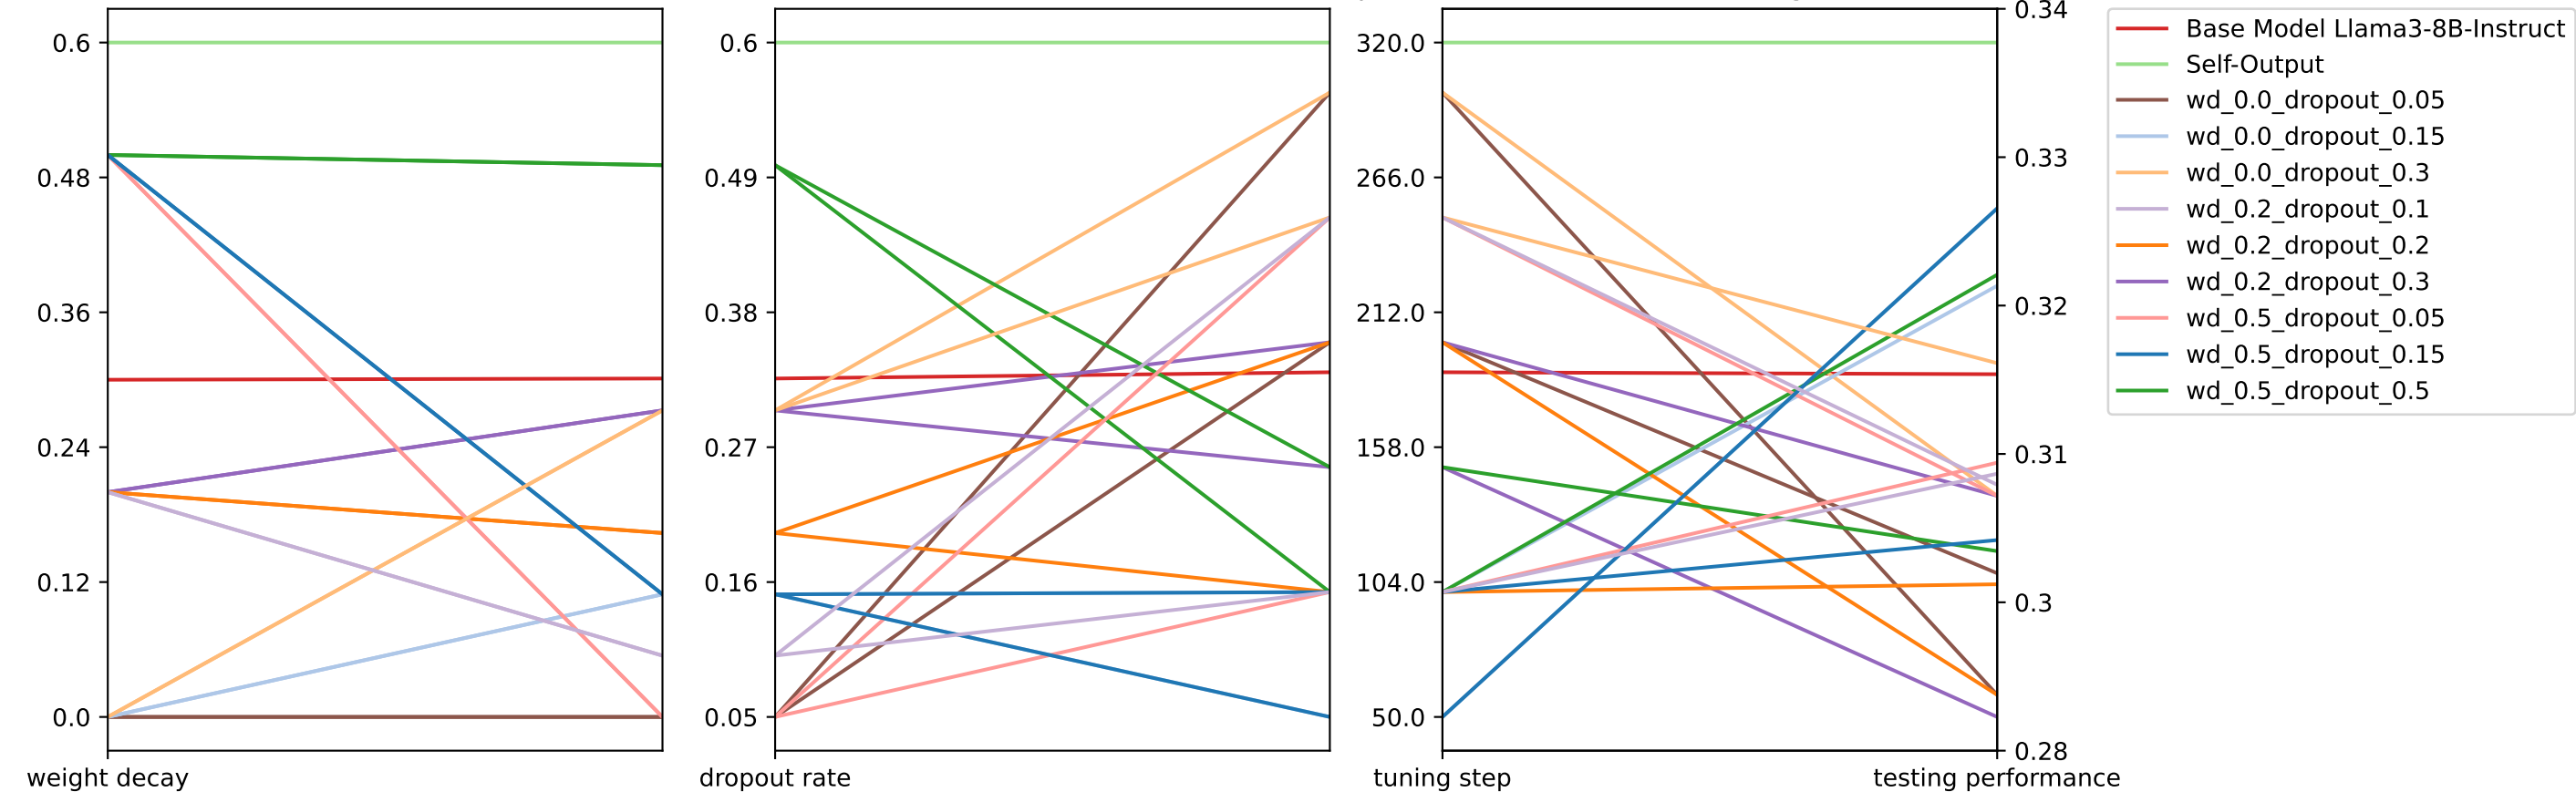

Supplement: supplementary_material [file regularization_outdomain.pdf › robust-llm-finetunes-rebuttal/figures/regularization_outdomain.pdf]
