# Supplementary material
Source: ML conference proceedings conference paper supplement (https://openreview.net/forum?id=1ktdvp1EYI)

# MATH (Target)

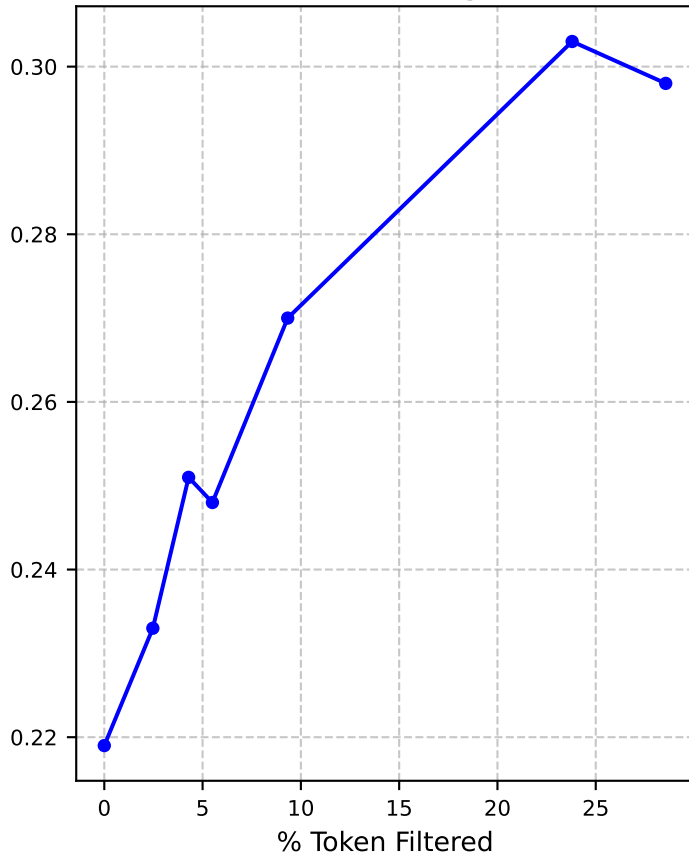

# GSM8K

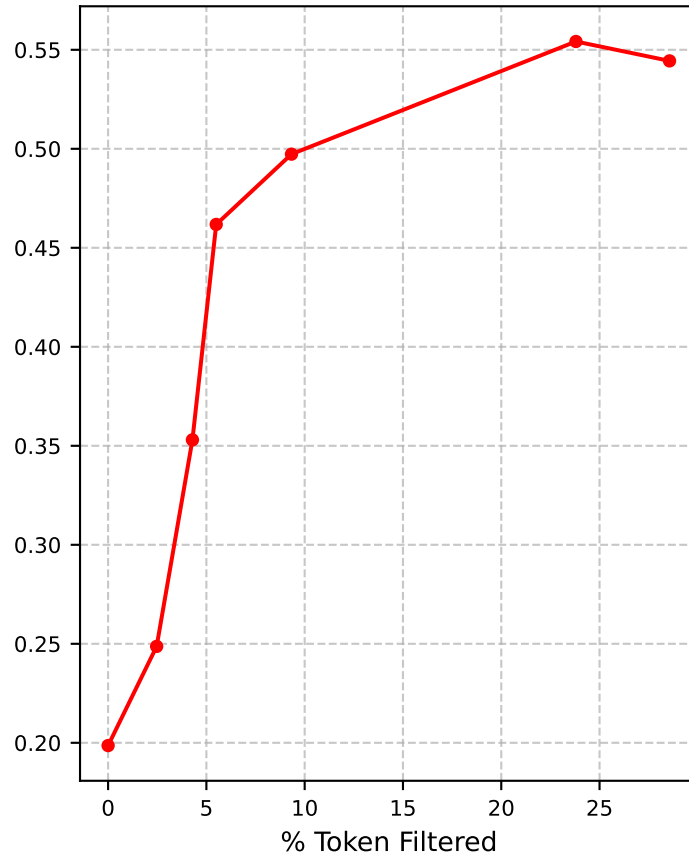

# ARC

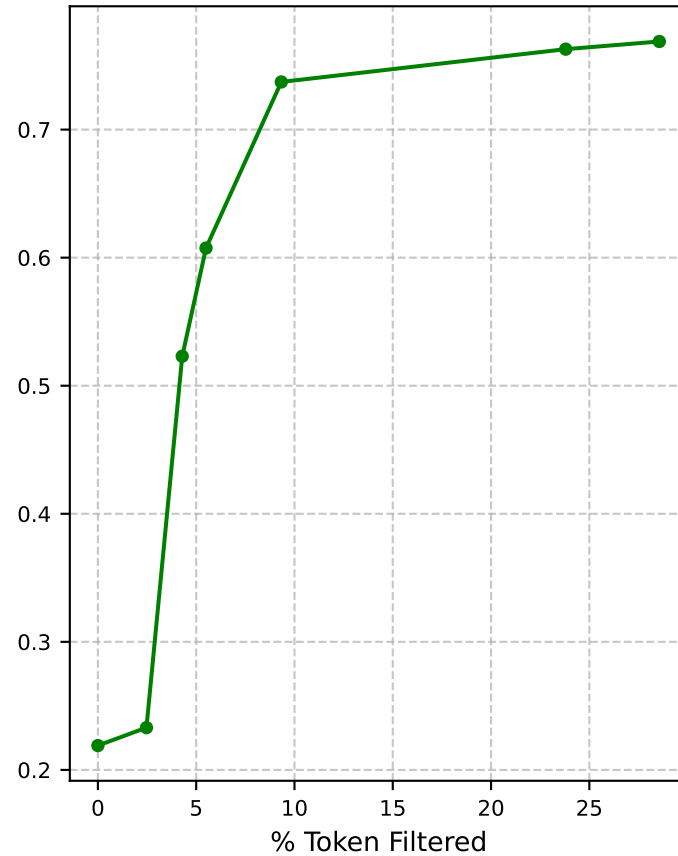

# MBPP

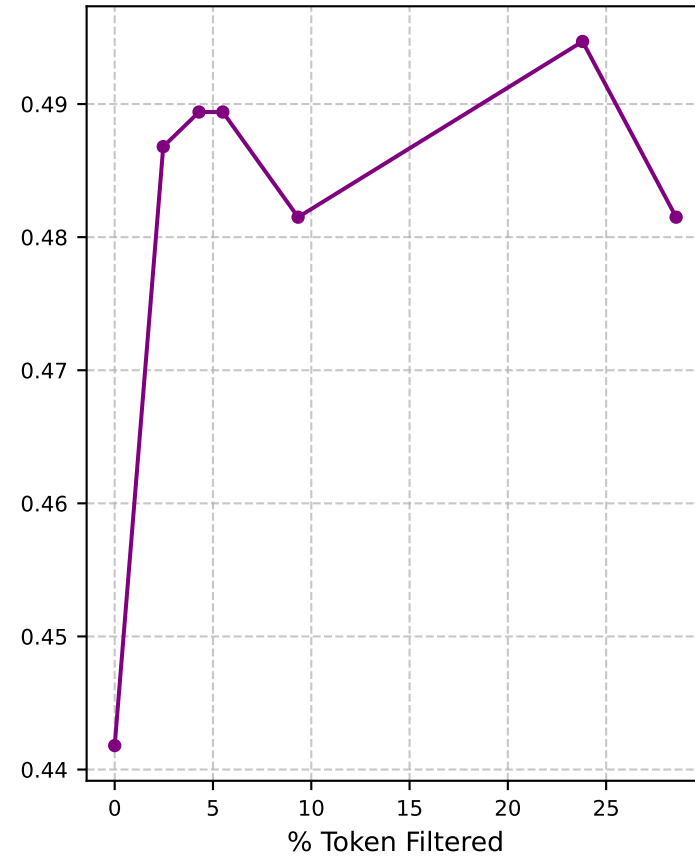

Supplement: supplementary_material [file stm_threshold_filter_gemma.pdf › robust-llm-finetunes-rebuttal/figures/stm_threshold_filter_gemma.pdf]
