# Supplementary material
Source: ML conference proceedings conference paper supplement (https://openreview.net/forum?id=1ktdvp1EYI)

# MATH Performance (In-domain)

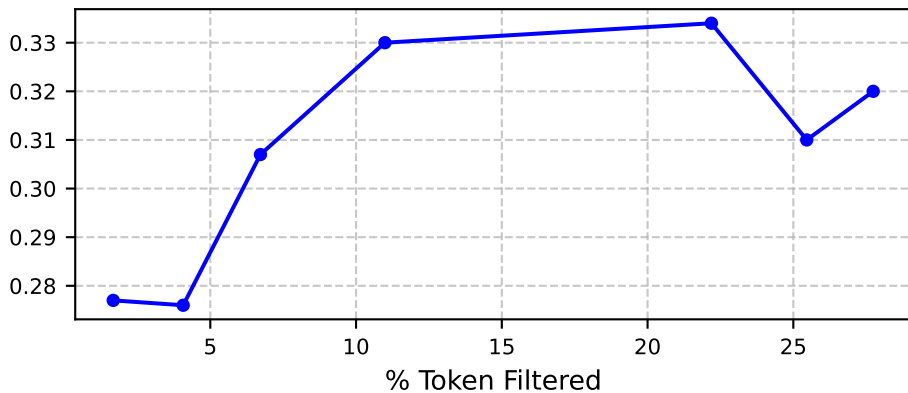

## GSM8K

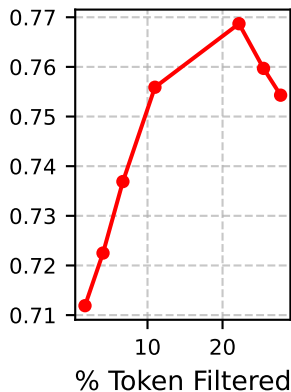

## ARC

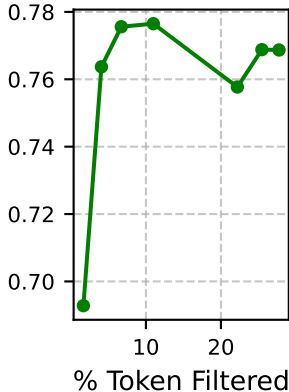

## BIRD

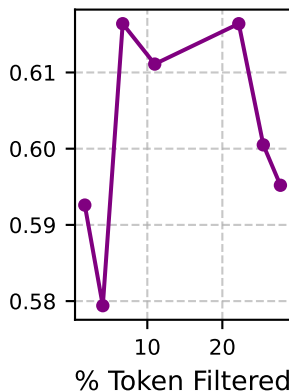

Supplement: supplementary_material [file stm_threshold_filter_llama.pdf › robust-llm-finetunes-rebuttal/figures/stm_threshold_filter_llama.pdf]
