# Supplementary material
Source: ML conference proceedings conference paper supplement (https://openreview.net/forum?id=1ktdvp1EYI)

# Normalized performances

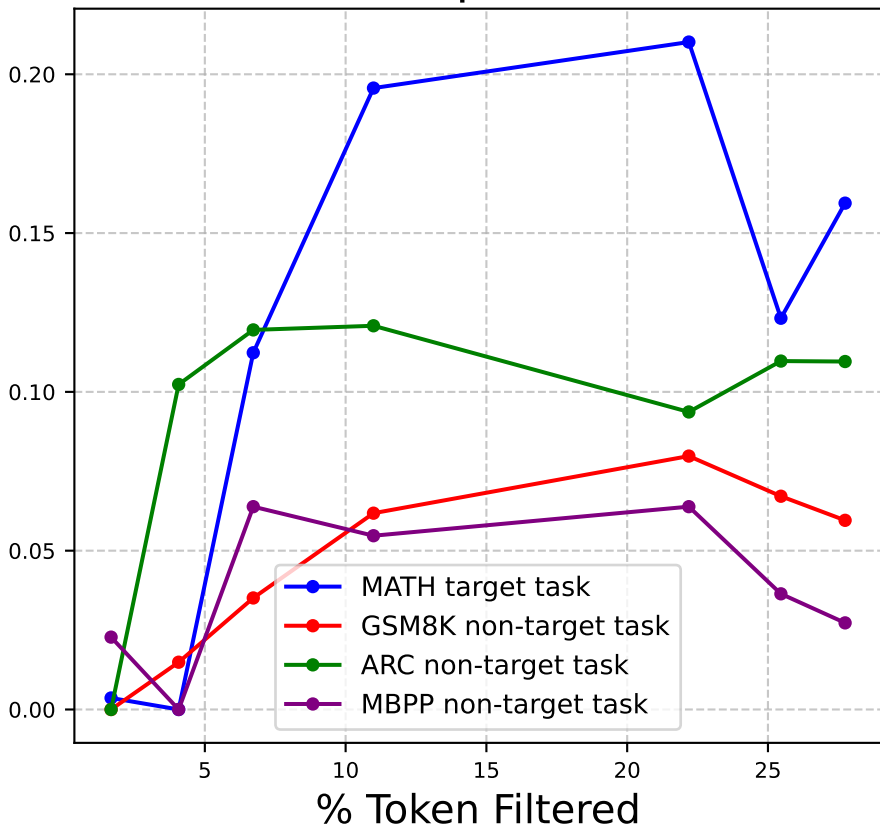

Supplement: supplementary_material [file stm_threshold_filter_overlapped.pdf › robust-llm-finetunes-rebuttal/figures/stm_threshold_filter_overlapped.pdf]
